# Supplementary material for: Solution-processed Au–Ag core–shell nanoparticle-decorated yarns for human motion monitoring
Source: Royal Society of Chemistry journal article supplement (doi:10.1039/c6ra26860a), 2017-01-01
Supplement: c6ra26860a1.pdf [file c6ra26860a1.pdf]

## Electronic supporting information

# Solution-processed Au-Ag core-shell nanoparticle-decorated yarns for human motion monitoring

*Hyung Ju Park,<sup>†</sup> WanJoong Kim,<sup>†</sup> Chil Sung Ah,<sup>†</sup> Yongseok Jun,<sup>‡</sup> Yong Ju Yun,<sup>\*,‡</sup>*

<sup>†</sup>Electronics and Telecommunications Research Institute (ETRI), Daejeon 34129, Republic of Korea. <sup>‡</sup>Department of Materials Chemistry and Engineering, Konkuk University, Seoul 05029, Republic of Korea.

\*E-mail: [yjyun@konkuk.ac.kr](mailto:yjyun@konkuk.ac.kr)

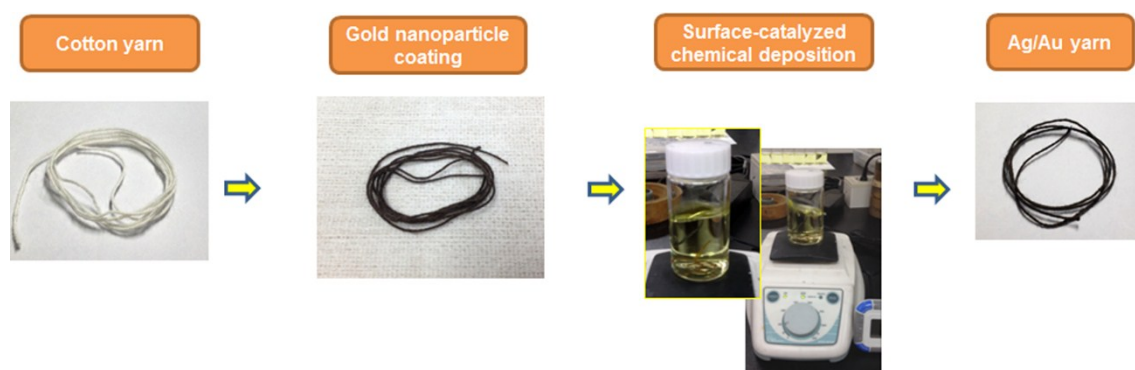

**Figure S1.** Preparation of the AuAgCSCY strain sensor.

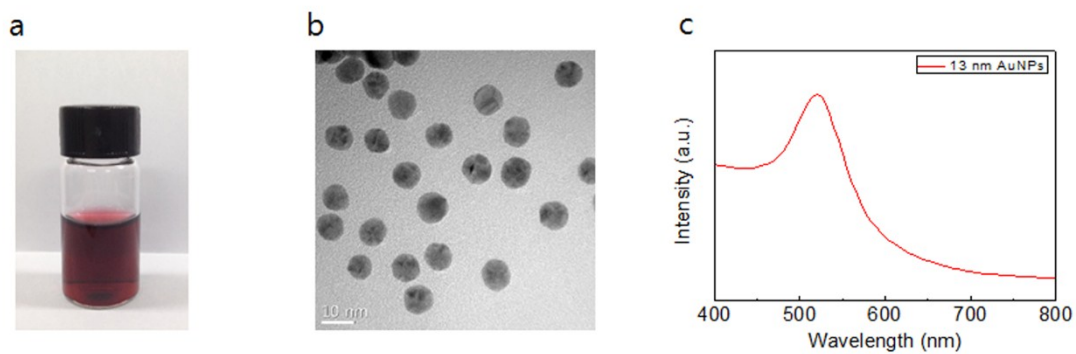

**Figure S2.** a, b, Photograph and TEM image of 13 nm gold nanoparticles. c, UV-VIS spectrum of gold nanoparticle solution.

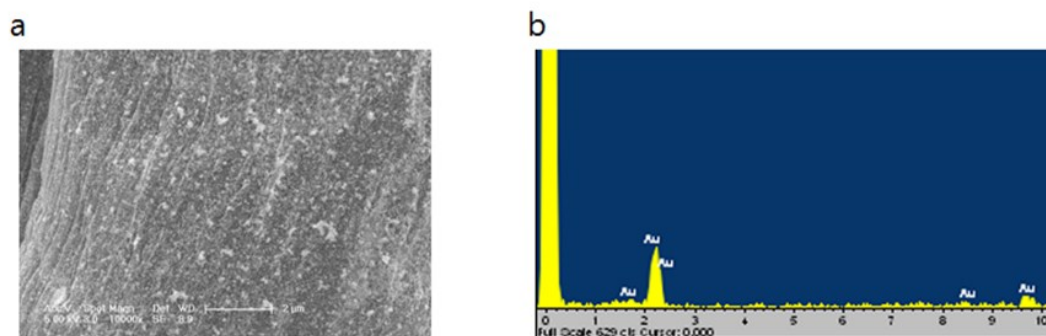

**Figure S3.** a, b, FESEM image and EDX spectrum of gold nanoparticle coated cotton yarn.

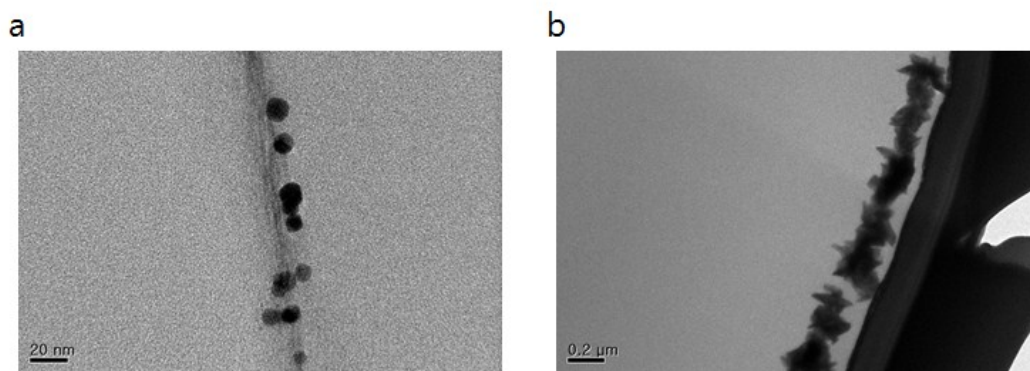

**Figure S4.** a, b, TEM images of AuCYs and AgAuCSCYs.

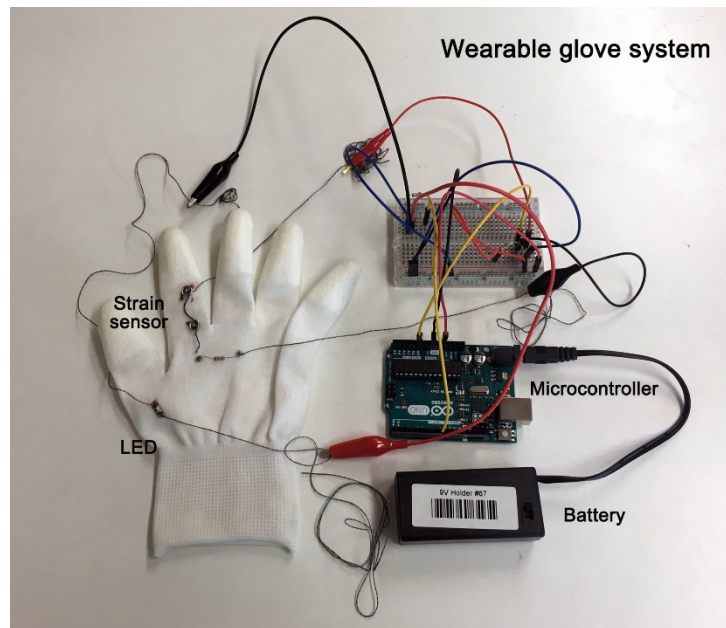

**Figure S5.** Wearable glove system for human motion detecting and LED display.

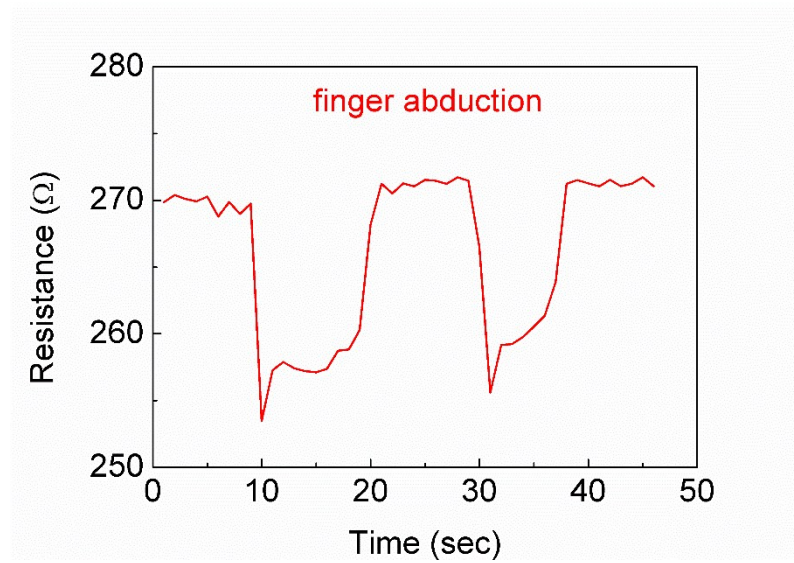

**Figure S6.** The selectivity of the strain sensor to other types of deformation (finger abduction).
